# Supplementary material for: Distinct Time Course of the Decrease in Hepatic AMP-Activated Protein Kinase and Akt Phosphorylation in Mice Fed a High Fat Diet
Source: PubMed Central journal article supplement (PMC4534138; doi:10.1371/journal.pone.0135554), 2015-08-12
Supplement: pone.0135554.s002.pdf [file pone.0135554.s002.pdf]

**S1 Table. Summary of research on the decreased phosphorylated AMPK levels in rodents fed a HFD**

| <b>Strain</b>      | <b>Age</b> | <b>HFD period</b> | <b>Composition</b> | <b>Further characteristics</b>                                                           | <b>Refs</b> |
|--------------------|------------|-------------------|--------------------|------------------------------------------------------------------------------------------|-------------|
| ddY mouse          | 7 weeks    | 2 weeks           | 60% fat            | No significant increase in body weight and fasting glucose                               | 15          |
| Sprague-Dawley rat | 8 weeks    | 3 weeks           | 60% fat            | No significant increase in body weight and fasting glucose                               | 16          |
| Sprague-Dawley rat | 3 weeks    | 15 weeks          | 45% fat            | Increased fasting glucose and hepatic TG content                                         | 17          |
| C57BL/6J mouse     | 5–6 weeks  | 16 weeks          | 60% fat            | Insulin resistance in ITT and glucose intolerance in GTT,<br>increased hepatic steatosis | 18          |
| Sprague-Dawley rat | 8 weeks    | 18 weeks          | 60% fat            | Increased BAT and epididymal WAT weight                                                  | 19          |
| Sprague-Dawley rat | 7 weeks    | 19 weeks          | 45% fat            | Increased body weight and fasting glucose                                                | 20          |
