# Supplementary material for: Distinct Time Course of the Decrease in Hepatic AMP-Activated Protein Kinase and Akt Phosphorylation in Mice Fed a High Fat Diet
Source: PubMed Central journal article supplement (PMC4534138; doi:10.1371/journal.pone.0135554), 2015-08-12
Supplement: pone.0135554.s003.pdf [file pone.0135554.s003.pdf]

**S2 Table. Summary of research on the decreased phosphorylated Akt levels in rodents fed a HFD**

| <b>Strain</b>      | <b>Age</b> | <b>HFD period</b> | <b>Composition</b> | <b>Glucose clamp</b>            | <b>Further characteristics</b>                                                                                                                       | <b>Refs</b> |
|--------------------|------------|-------------------|--------------------|---------------------------------|------------------------------------------------------------------------------------------------------------------------------------------------------|-------------|
| Sprague-Dawley rat | Young      | 3 days            | 60% fat            | Decreased GIR,<br>increased HGP | Increased hepatic TG content                                                                                                                         | 21          |
| Sprague-Dawley rat | Adult      | 3 days            | 60% fat            | Increased HGP                   | Increased hepatic TG content, increased PKC $\epsilon$ and JNK activity in the liver                                                                 | 22          |
| C57BL/6 mouse      | 12 weeks   | 4 days            | 45% fat            | Decreased GIR                   | Glucose intolerance in GTT, increased hepatic lipid content, decreased TNF $\alpha$ mRNA in the liver                                                | 23          |
| C57BL/6 mouse      | 5 weeks    | 3 days            | 60% fat            | Decreased GIR,<br>increased HGP | Increased body weight, epididymal adipose tissue weight, and hepatic lipid content, increased F4/80, CD68, CD11b and CD11c mRNA content in the liver | 24          |
